# Supplementary material for: Co-detection of respiratory syncytial virus with other respiratory viruses across all age groups before and during the COVID-19 pandemic
Source: Frontiers journal article supplement (doi:10.3389/fviro.2023.1156012), 2023-03-24
Supplement: Table_2.docx [file Table_2.docx]

**Table S2.** Logistic regression models comparing the odds of hospitalization, and among those hospitalized, oxygen use, ICU admission, and intubation between children 0–4 years old with RSV single detection (reference group) and those with co-detection, including age at testing as a covariate. Values of *p* significant at a nominal value of *α*=0.05 are indicated in bold.

| **Outcome** | **OR (95% CI); *p* value** |
| --- | --- |
| Hospitalization | 0.73 (0.63–0.84); **<0.001** |
| Oxygen use | 0.89 (0.71–1.13); 0.34 |
| ICU admission | 0.96 (0.77–1.19); 0.70 |
| Intubation | 1.13 (0.76–1.69); 0.54 |

**Abbreviations:** RSV, respiratory syncytial virus; ICU, intensive care unit; OR, odds ratio; 95% CI, 95% confidence interval.
